# Supplementary material for: Phytochemicals protect L02 cells against hepatotoxicity induced by emodin via the Nrf2 signaling pathway
Source: Royal Society of Chemistry journal article supplement (doi:10.1039/c9tx00220k), 2019-11-01
Supplement: c9tx00220k2.pdf [file c9tx00220k2.pdf]

file:///C:/Users/EDZ/Desktop/M025%20R1%20191106/Supplemental%20file%20-L-02.html

**Result of STR matching analysis by your data.**

- DSMZ Profile Database -

A graphical presentation is shown at the bottom of this page.

| EV          | Cell No.   | Cell name                                                         | Locus names  |                  |              |             |              |            |            |              |              | Figures |
|-------------|------------|-------------------------------------------------------------------|--------------|------------------|--------------|-------------|--------------|------------|------------|--------------|--------------|---------|
|             |            |                                                                   | D5S818       | D13S317          | D7S820       | D16S539     | VWA          | TH01       | AM         | TPOX         | CSF1PO       |         |
|             |            | <i>Query (Your Cell)</i>                                          | <i>11,12</i> | <i>13.3,13.3</i> | <i>12,12</i> | <i>9,10</i> | <i>16,16</i> | <i>7,7</i> | <i>X,X</i> | <i>12,12</i> | <i>10,10</i> |         |
| 0.83(30/36) | CCL-21     | AV3                                                               | 11.12        | 13.3,13.3        | 12.12        | 9.10        | 16.18        | 7.7        | X,X        | 8.12         | 9.10         | -       |
| 0.78(28/36) | 227        | BT-B                                                              | 11.12        | 13.3,13.3        | 8.12         | 9.10        | 16.18        | 7.7        | X,X        | 8.12         | 9.10         | -       |
| 0.78(28/36) | 228        | SBC-2                                                             | 11.12        | 12.13.3          | 12.12        | 9.10        | 16.18        | 7.7        | X,X        | 8.12         | 9.10         | -       |
| 0.78(28/36) | 229        | SBC-7                                                             | 11.12        | 12.13.3          | 12.12        | 9.10        | 16.18        | 7.7        | X,X        | 8.12         | 9.10         | -       |
| 0.78(28/36) | CCL-2.2    | HeLa S3                                                           | 11.12        | 13.3,13.3        | 8.12         | 9.10        | 16.18        | 7.7        | X,X        | 8.12         | 9.10         | -       |
| 0.78(28/36) | CCL-25     | WISH                                                              | 11.12        | 13.3,13.3        | 8.12         | 9.10        | 16.18        | 7.7        | X,X        | 8.12         | 9.10         | -       |
| 0.78(28/36) | CRL-13003  | GH354                                                             | 11.12        | 13.3,13.3        | 8.12         | 9.10        | 16.18        | 7.7        | X,X        | 8.12         | 9.10         | -       |
| 0.78(28/36) | IFO50004   | WISH                                                              | 11.12        | 13.3,13.3        | 8.12         | 9.10        | 16.18        | 7.7        | X,X        | 8.12         | 9.10         | -       |
| 0.78(28/36) | JCRB0213   | HeLa AG                                                           | 11.12        | 13.3,13.3        | 8.8          | 9.10        | 16.18        | 7.7        | X,X        | 12.12        | 9.10         | -       |
| 0.78(28/36) | JCRB0214   | HeLa TG                                                           | 11.12        | 13.3,13.3        | 8.8          | 9.10        | 16.18        | 7.7        | X,X        | 12.12        | 9.10         | -       |
| 0.78(28/36) | JCRB0215   | HeLa TG CAP                                                       | 11.12        | 13.3,13.3        | 8.8          | 9.10        | 16.18        | 7.7        | X,X        | 12.12        | 9.10         | -       |
| 0.78(28/36) | JCRB0649.1 | HeLa.P3                                                           | 11.12        | 12.13.3          | 8.12         | 9.10        | 16.18        | 7.7        | X,X        | 8.12         | 9.10         | -       |
| 0.74(26/35) | RCB2105    | D98-AH2                                                           | 11.12        |                  | 12.12        | 9.10        | 16.18        | 7.7        | X,X        | 8.12         | 9.10,11      | -       |
| 0.72(26/36) | 57         | HELA                                                              | 11.12        | 12.13.3          | 8.12         | 9.10        | 16.18        | 7.7        | X,X        | 8.12         | 9.10         | -       |
| 0.72(26/36) | 57         | HELA                                                              | 11.12        | 12.13.3          | 8.12         | 9.10        | 16.18        | 7.7        | X,X        | 8.12         | 9.10         | -       |
| 0.72(26/36) | 116        | GIRARDI HEART C2                                                  | 11.12        | 12.13.3          | 8.12         | 9.10        | 16.18        | 7.7        | X,X        | 8.12         | 9.10         | -       |
| 0.72(26/36) | 121        | GIRARDI HEART C7                                                  | 11.12        | 12.13.3          | 8.12         | 9.10        | 16.18        | 7.7        | X,X        | 8.12         | 9.10         | -       |
| 0.72(26/36) | 136        | KB                                                                | 11.12        | 12.13.3          | 8.12         | 9.10        | 16.18        | 7.7        | X,X        | 8.12         | 9.10         | -       |
| 0.72(26/36) | 149        | KB-V1                                                             | 11.12        | 12.13.3          | 8.12         | 9.10        | 16.18        | 7.7        | X,X        | 8.12         | 9.10         | -       |
| 0.72(26/36) | 158        | KB-3-1                                                            | 11.12        | 12.13.3          | 8.12         | 9.10        | 16.18        | 7.7        | X,X        | 8.12         | 9.10         | -       |
| 0.72(26/36) | 161        | HELA-S3                                                           | 11.12        | 12.13.3          | 8.12         | 9.10        | 16.18        | 7.7        | X,X        | 8.12         | 9.10         | -       |
| 0.72(26/36) | CCL-13     | HeLa [Chang Liver]                                                | 12.12        | 12.13.3          | 8.12         | 9.10        | 16.18        | 7.7        | X,X        | 8.12         | 10.10        | -       |
| 0.72(26/36) | CCL-17     | KB                                                                | 11.12        | 12.13.3          | 8.12         | 9.10        | 16.18        | 7.7        | X,X        | 8.12         | 9.10         | -       |
| 0.72(26/36) | CCL-2      | HeLa                                                              | 11.12        | 12.13.3          | 8.12         | 9.10        | 16.18        | 7.7        | X,X        | 8.12         | 9.10         | -       |
| 0.72(26/36) | CCL-2.1    | HeLa 229                                                          | 11.12        | 12.13.3          | 8.12         | 9.10        | 16.18        | 7.7        | X,X        | 8.12         | 9.10         | -       |
| 0.72(26/36) | CCL-20.2   | clone 1-5c-4 [Wong-Kilbourne derivative (D) of Chang conjunctiva] | 11.12        | 12.13.3          | 8.12         | 9.10        | 16.18        | 7.7        | X,X        | 8.12         | 9.10         | -       |
| 0.72(26/36) | CCL-23     | Hep-2                                                             | 11.12        | 12.13.3          | 8.12         | 9.10        | 16.18        | 7.7        | X,X        | 8.12         | 9.10         | -       |
| 0.72(26/36) | CCL-5      | L-132                                                             | 11.12        | 12.13.3          | 8.12         | 9.10        | 16.18        | 7.7        | X,X        | 8.12         | 9.10         | -       |
| 0.72(26/36) | CCL-6      | intestine 407                                                     | 11.12        | 12.13.3          | 8.12         | 9.10        | 16.18        | 7.7        | X,X        | 8.12         | 9.10         | -       |
| 0.72(26/36) | CCL-62     | FL                                                                | 11.12        | 12.13.3          | 8.12         | 9.10        | 16.18        | 7.7        | X,X        | 8.12         | 9.10         | -       |
| 0.72(26/36) | CL-48      | WRL 68                                                            | 11.12        | 12.13.3          | 8.12         | 9.10        | 16.18        | 7.7        | X,X        | 8.12         | 9.10         | -       |
| 0.72(26/36) | CRL-12510  | HeLa NRI                                                          | 11.12        | 12.13.3          | 8.12         | 9.10        | 16.18        | 7.7        | X,X        | 8.12         | 9.10         | -       |
| 0.72(26/36) | CRL-13002  | GH329                                                             | 11.12        | 12.13.3          | 8.12         | 9.10        | 16.18        | 7.7        | X,X        | 8.12         | 9.10         | -       |
| 0.72(26/36) | CRL-13011  | HeLaNRI                                                           | 11.12        | 12.13.3          | 8.12         | 9.10        | 16.18        | 7.7        | X,X        | 8.12         | 9.10         | -       |
| 0.72(26/36) | CRL-1958   | HiHeLa                                                            | 11.12        | 12.13.3          | 8.12         | 9.10        | 16.18        | 7.7        | X,X        | 8.12         | 9.10         | -       |
| 0.72(26/36) | CRL-2972   | HeLaRC32 [HeRC32]                                                 | 11.12        | 12.13.3          | 8.12         | 9.10        | 16.18        | 7.7        | X,X        | 8.12         | 9.10         | -       |
| 0.72(26/36) | CRM-CCL-2  | HeLa                                                              | 11.12        | 12.13.3          | 8.12         | 9.10        | 16.18        | 7.7        | X,X        | 8.12         | 9.10         | -       |
| 0.72(26/36) | IFO50005   | J-111                                                             | 11.12        | 12.13.3          | 8.12         | 9.10        | 16.18        | 7.7        | X,X        | 8.12         | 9.10         | -       |
| 0.72(26/36) | IFO50016   | Chang Liver                                                       | 11.12        | 12.13.3          | 8.12         | 9.10        | 16.18        | 7.7        | X,X        | 8.12         | 9.10         | -       |
| 0.72(26/36) | JCRB0073   | J-111                                                             | 11.12        | 12.13.3          | 8.12         | 9.10        | 16.18        | 7.7        | X,X        | 8.12         | 9.10         | -       |
| 0.72(26/36) | JCRB0649   | HeLa.P3                                                           | 11.12        | 12.13.3          | 8.12         | 9.10        | 16.18        | 7.7        | X,X        | 8.12         | 9.10         | -       |
| 0.72(26/36) | JCRB1309   | RPMI4788                                                          | 11.12        | 13.3,13.3        | 8.12         | 10.10       | 16.18        | 7.7        | X,X        | 8.12         | 9.10         | -       |
| 0.72(26/36) | JCRB1318   | HeLa9903                                                          | 11.12        | 12.13.3          | 8.12         | 9.10        | 16.18        | 7.7        | X,X        | 8.12         | 9.10         | -       |
| 0.72(26/36) | JCRB9004   | HeLa                                                              | 11.12        | 12.13.3          | 8.12         | 9.10        | 16.18        | 7.7        | X,X        | 8.12         | 9.10         | -       |
| 0.72(26/36) | JCRB9027   | KB                                                                | 11.12        | 12.13.3          | 8.12         | 9.10        | 16.18        | 7.7        | X,X        | 8.12         | 9.10         | -       |
| 0.72(26/36) | JCRB9086   | HeLa229                                                           | 11.12        | 12.13.3          | 8.12         | 9.10        | 16.18        | 7.7        | X,X        | 8.12         | 9.10         | -       |
| 0.71(24/34) | RCB0191    | HeLa.S3                                                           | 11.12        |                  | 8.12         | 9.10        | 16.18        | 7.7        | X,X        | 8.12         | 9.10         | -       |
| 0.71(24/34) | RCB0205    | BU25 TK-                                                          | 11.12        |                  | 8.12         | 9.10        | 16.18        | 7.7        | X,X        | 8.12         | 9.10         | -       |
| 0.71(24/34) | RCB1525    | HeLa.S3                                                           | 11.12        |                  | 8.12         | 9.10        | 16.18        | 7.7        | X,X        | 8.12         | 9.10         | -       |
| 0.71(24/34) | RCB1891    | HeLa TG                                                           | 11.12        |                  | 8.8          | 9.10        | 16.18        | 7.7        | X,X        | 12.12        | 9.10         | -       |
| 0.70(26/37) | JCRB9010   | HeLa S3                                                           | 11.12        | 13.3,13.3        | 8.8          | 9.10        | 16.17,18     | 7.7        | X,X        | 8.12         | 9.10         | -       |
| 0.70(26/37) | JCRB9066   | Chang Liver                                                       | 11.12        | 12.13.3          | 8.12         | 9.10        | 16.17,18     | 7.7        | X,X        | 8.12         | 9.10         | -       |
| 0.67(24/36) | RCB0007    | HeLa                                                              | 11.12        | 12.12            | 8.12         | 9.10        | 16.18        | 7.7        | X,X        | 8.12         | 9.10         | -       |
| 0.67(24/36) | RCB0402    | "HeLa.P3"                                                         | 11.12        | 12.12            | 8.12         | 9.10        | 16.18        | 7.7        | X,X        | 8.12         | 9.10         | -       |
| 0.67(24/36) | RCB1889    | Hep-2                                                             | 11.12        | 12.12            | 8.12         | 9.10        | 16.18        | 7.7        | X,X        | 8.12         | 9.10         | -       |
| 0.67(24/36) | RCB2356    | HeLa-CD4-LTR-??-gal                                               | 11.12        | 12.12            | 8.12         | 9.10        | 16.18        | 7.7        | X,X        | 8.12         | 9.10         | -       |
| 0.67(24/36) | RCB2358    | H1tat                                                             | 11.12        | 12.12            | 8.12         | 9.10        | 16.18        | 7.7        | X,X        | 8.12         | 9.10         | -       |
| 0.65(24/37) | CRL-2182   | EPLC-32M1                                                         | 11.12        | 13.3,14.3        | 8.12         | 9.10        | 17.18        | 7.7        | X,X        | 8.12,13      | 9.10         | -       |
| 0.61(22/36) | 537        | HCC-1143                                                          | 11.11        | 12.12            | 12.12        | 11.13       | 16.16        | 9.3,9.3    | X,X        | 12.12        | 10.10        | -       |
| 0.61(22/36) | CHB0001    | HSV                                                               | 11.11        | 12.13.3          | 8.12         | 9.10        | 16.18        | 7.7        | X,X        | 8.12         | 9.9          | -       |
| 0.61(22/36) | CRL-2321   | HCC1143                                                           | 11.11        | 12.12            | 12.12        | 11.13       | 16.16        | 9.3,9.3    | X,X        | 12.12        | 10.10        | -       |
| 0.61(22/36) | IFO50011   | HeLa S3                                                           | 11.11        | 12.13.3          | 8.12         | 9.10        | 17.18        | 7.7        | X,X        | 8.12         | 9.10         | -       |
| 0.61(22/36) | JCRB0713   | HeLa S3(sc)                                                       | 11.11        | 12.13.3          | 8.12         | 9.10        | 17.18        | 7.7        | X,X        | 8.12         | 9.10         | -       |
| 0.61(22/36) | RCB2355    | HeLa CD4+Clone1022                                                | 11.12        | 12.12            | 8.12         | 9.9         | 16.18        | 7.7        | X,X        | 8.12         | 9.10         | -       |

Analyze again | after changing the EV (0.60 ▾)

| EV        | Cell No. Scored |
|-----------|-----------------|
| 0.95-1.00 | 0               |
| 0.90-0.95 | 0               |
| 0.85-0.90 | 0               |
| 0.80-0.85 | 1               |
| 0.75-0.80 | 11              |
| 0.70-0.75 | 40              |
| 0.65-0.70 | 6               |
| 0.60-0.65 | 6               |
| 0.55-0.60 | 20              |
| 0.50-0.55 | 47              |
| 0.45-0.50 | 7               |
| 0.40-0.45 | 94              |
| 0.35-0.40 | 308             |
| 0.30-0.35 | 365             |
| 0.25-0.30 | 760             |
| 0.20-0.25 | 722             |
| 0.15-0.20 | 470             |
| 0.10-0.15 | 186             |
| 0.05-0.10 | 21              |
| 0.00-0.05 | 10              |

If the results obtained by the search engine are used in any publication, please cite the respective paper: Dirks WG, MacLeod RA, Nakamura Y, Kohara A, Reid Y, Milch H, Drexler HG, Mizusawa H: Cell line cross-contamination initiative: an interactive reference database of STR profiles covering common cancer cell lines. Int J Cancer. 2010 Jan 1;126(1):303-4. (link: <http://onlinelibrary.wiley.com/doi/full/10.1002/ijc.24999>)
