# Supplementary material for: Phytochemicals protect L02 cells against hepatotoxicity induced by emodin via the Nrf2 signaling pathway
Source: Royal Society of Chemistry journal article supplement (doi:10.1039/c9tx00220k), 2019-11-01
Supplement: c9tx00220k4.pdf [file c9tx00220k4.pdf]

Supplementary figure 1 The structures of Dihydromyricetin (DMY), hyperoside and silybin.

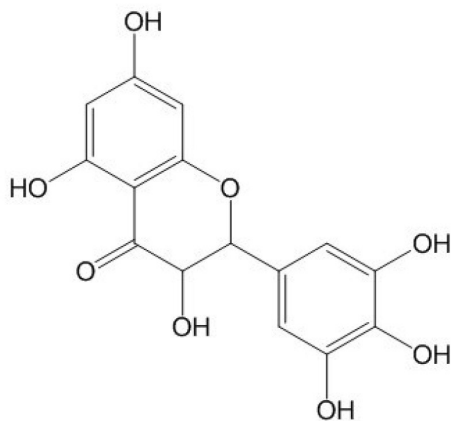

dihydromyricetin (DMY)

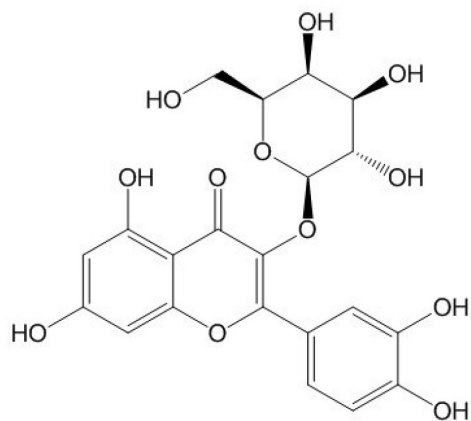

hyperoside

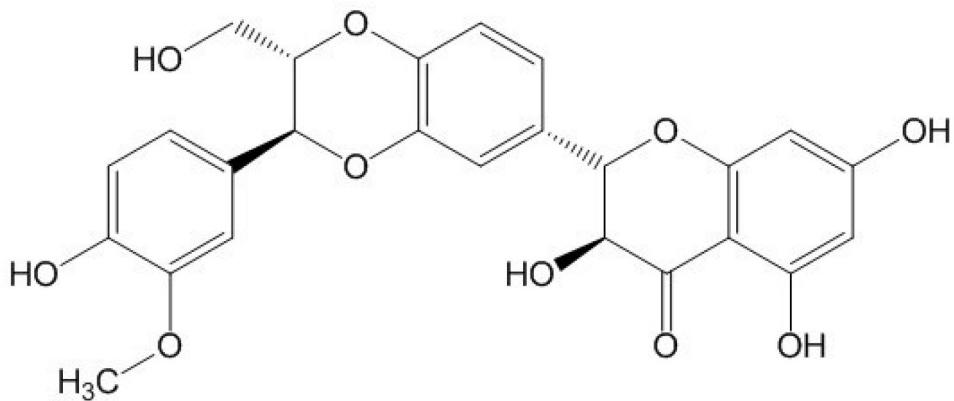

silybin
