# Supplementary figures and images for: Phytochemicals protect L02 cells against hepatotoxicity induced by emodin via the Nrf2 signaling pathway
Source: Royal Society of Chemistry journal article supplement (doi:10.1039/c9tx00220k), 2019-11-01

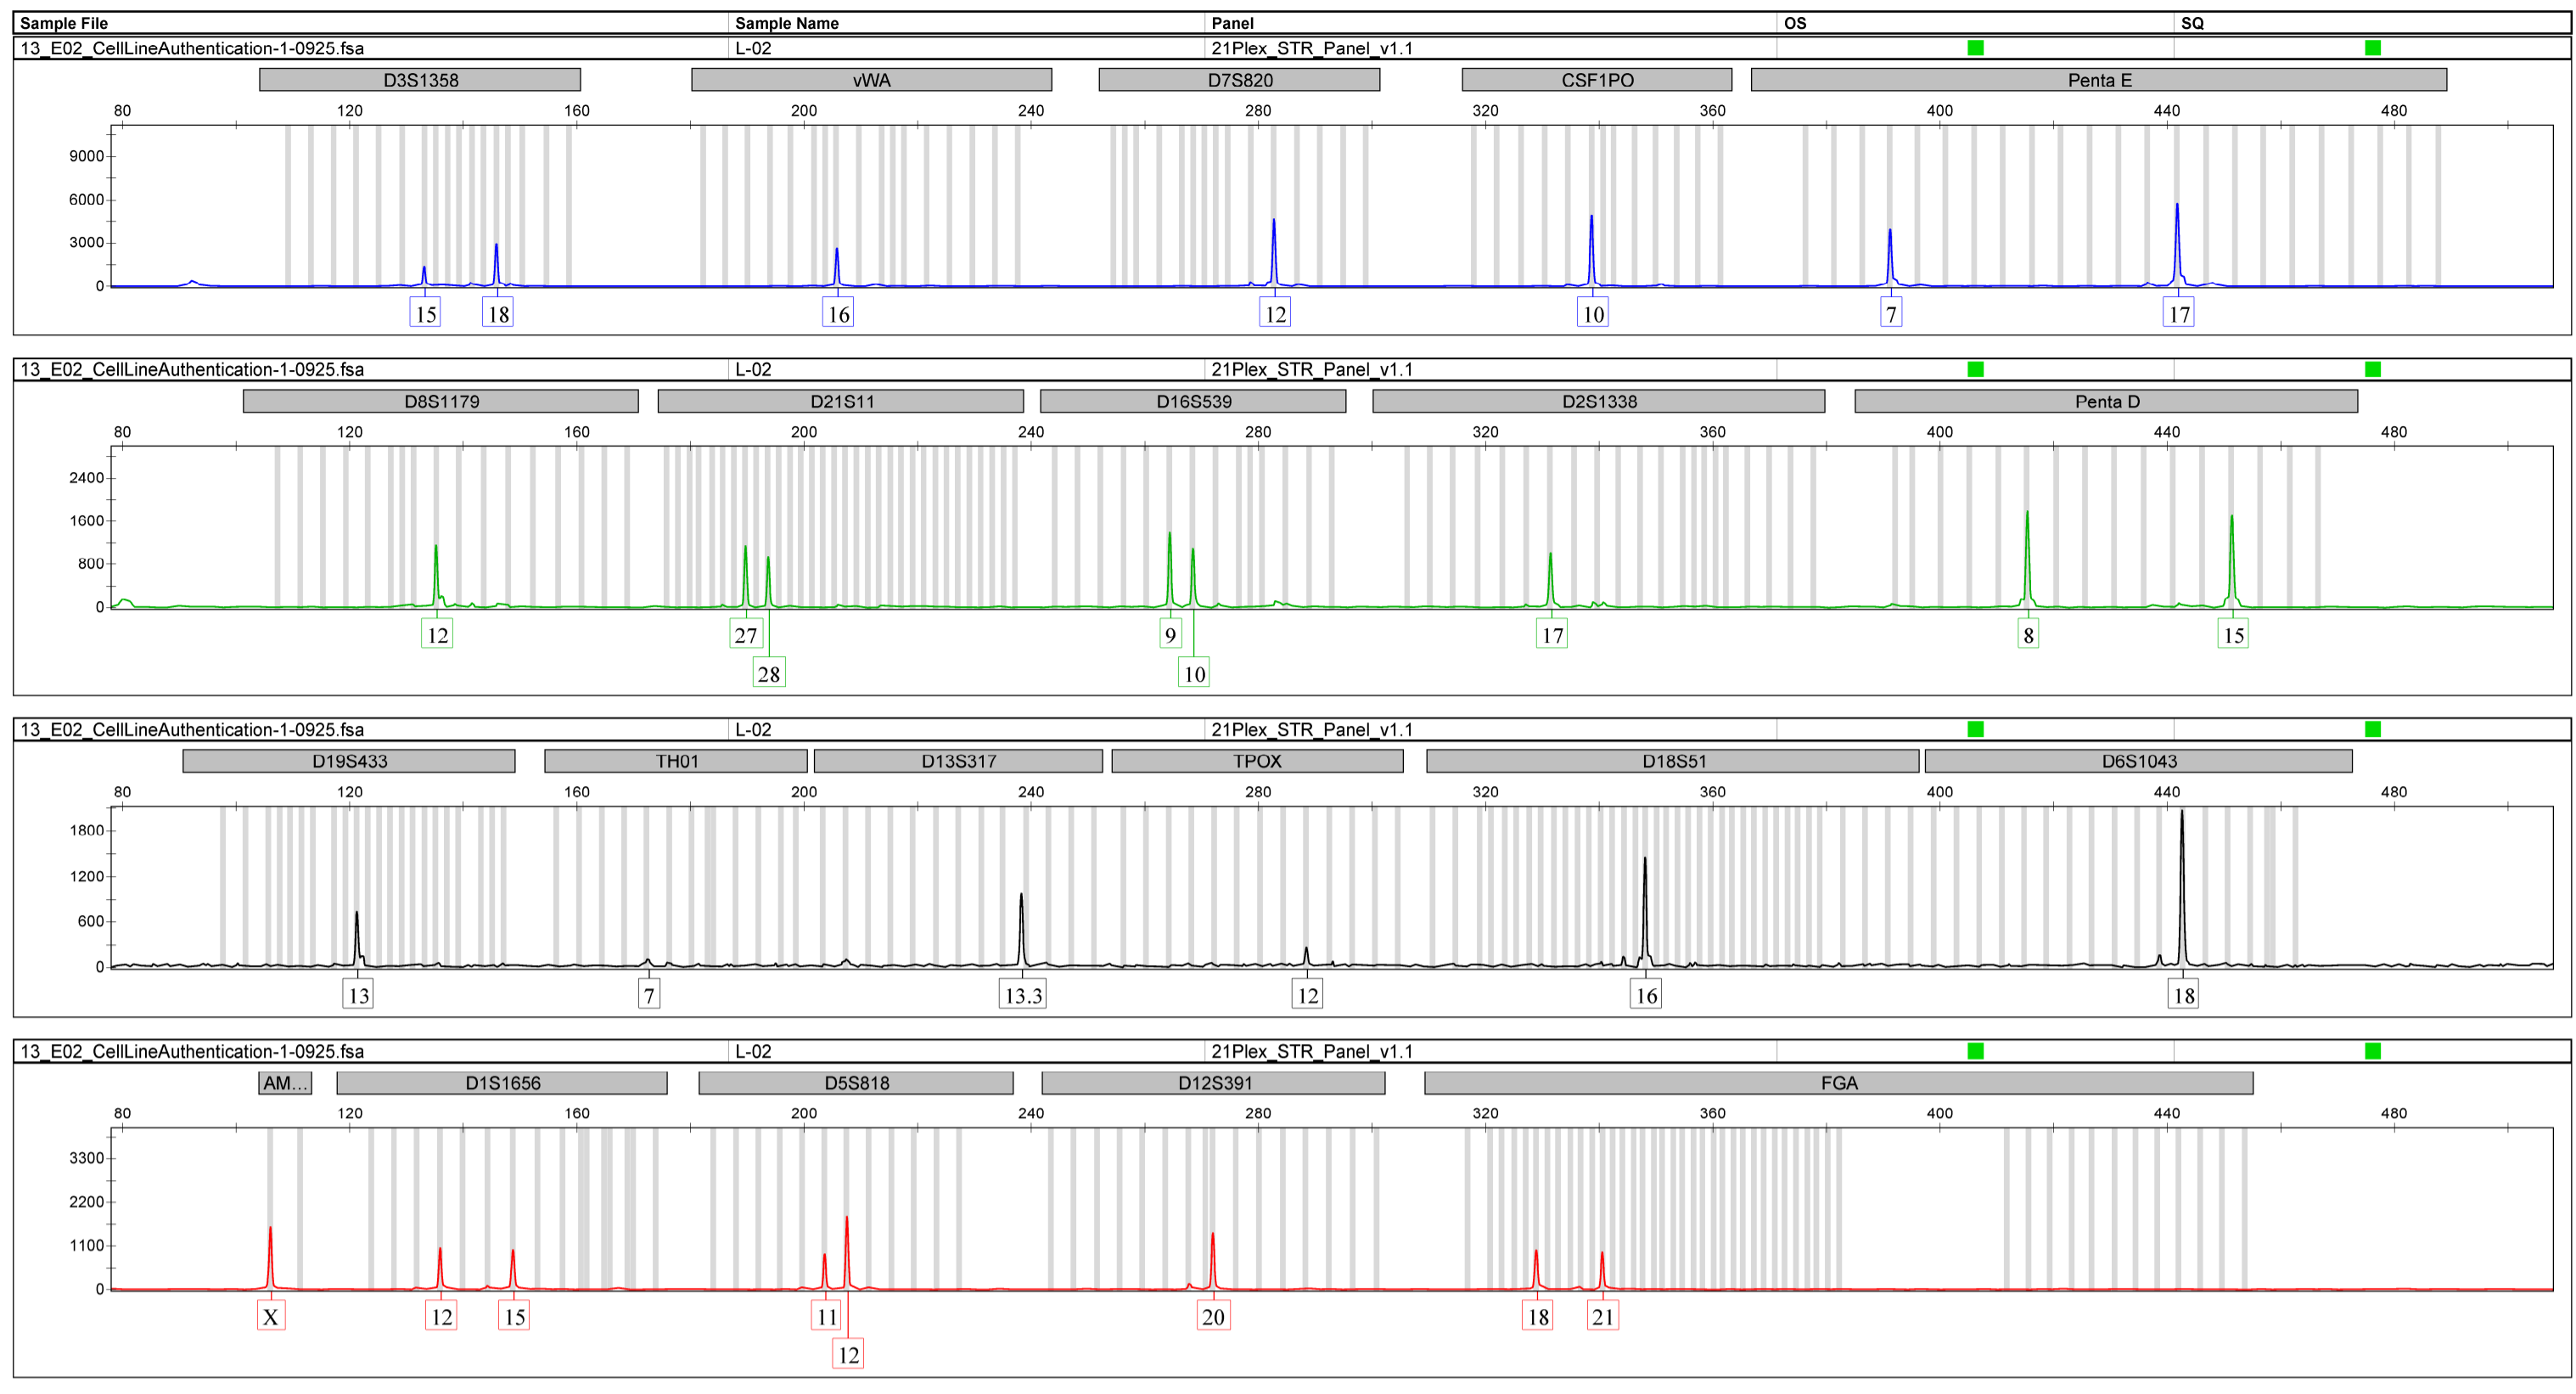

Supplement: c9tx00220k1.pdf [file c9tx00220k1.pdf]
